# Supplementary material for: The CoMo-LDH ultrathin nanosheet as a highly active and bifunctional electrocatalyst for overall water splitting
Source: Royal Society of Chemistry journal article supplement (doi:10.1039/c8qi00867a), 2018-01-01
Supplement: c8qi00867a1.pdf [file c8qi00867a1.pdf]

## Supporting Information

### CoMo-LDH ultrathin nanosheets as a highly active and bifunctional electrocatalyst for overall water splitting

Jian Bao<sup>1,\*</sup>, Zhaolong Wang<sup>1</sup>, Junfeng Xie<sup>2</sup>, Li Xu<sup>1</sup>, Fengcai Lei<sup>2</sup>, Meili Guan<sup>1</sup>, Yunpeng Huang<sup>1</sup>, Yan Zhao<sup>1</sup>, Jiexiang Xia<sup>1</sup>, Huaming Li<sup>1,\*</sup>

1. Institute for Energy Research, School of Chemistry and Chemical Engineering, Jiangsu University, Zhenjiang, Jiangsu, 212013, P. R. China.

2. College of Chemistry, Chemical Engineering and Materials Science, Key Laboratory of Molecular and Nano Probes (Ministry of Education), Collaborative Innovation Center of Functionalized Probes for Chemical Imaging in Universities of Shandong, Institute of Molecular and Nano Science, Shandong Normal University, Jinan, Shandong, 250014, P. R. China.

Correspondence: baojian@ujs.edu.cn; lhm@ujs.edu.cn

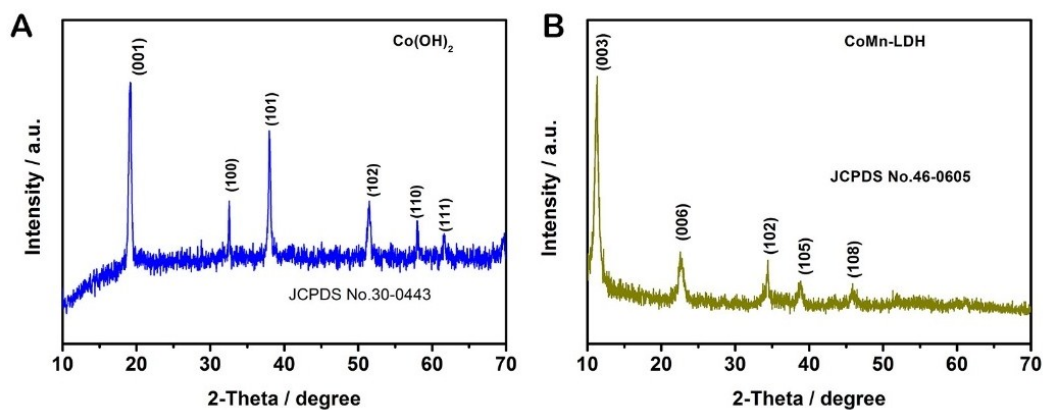

Figure S1. XRD patterns of  $\text{Co(OH)}_2$  and  $\text{CoMn-LDH}$  samples.

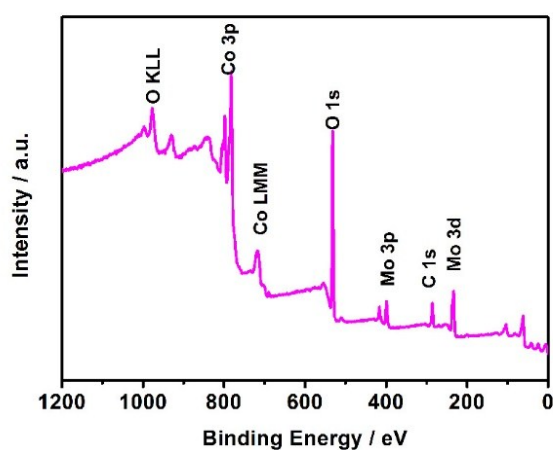

Figure S2. XPS survey spectrum of  $\text{CoMo-LDH}$ .

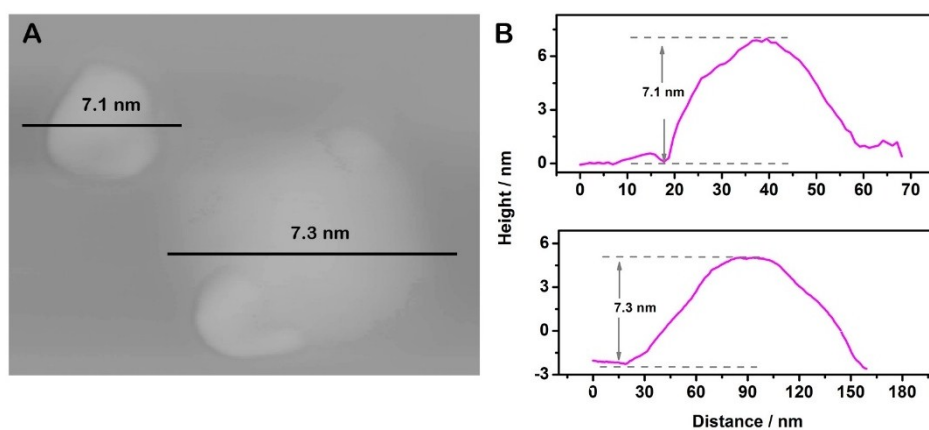

Figure S3. (A) tapping mode AFM image of the  $\text{CoMo-LDH}$  (B) the corresponding height profile of the  $\text{CoMo-LDH}$ .

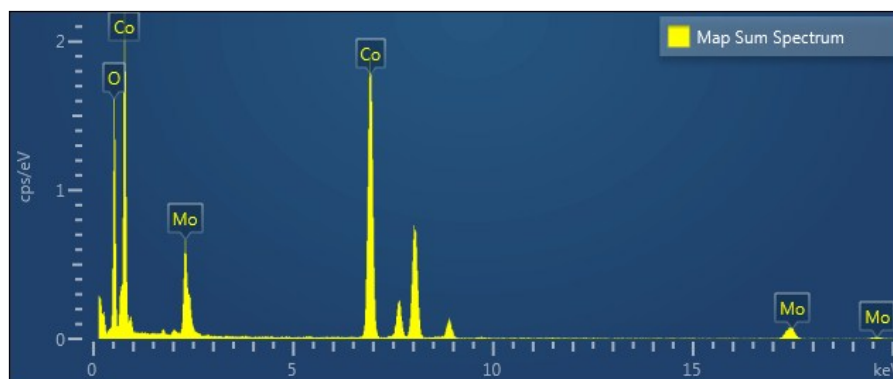

| Element | Line Type | k factor | Absorption Correction | Wt%    | Wt% Sigma |
|---------|-----------|----------|-----------------------|--------|-----------|
| O       | K series  | 1.86867  | 1.00                  | 24.06  | 0.42      |
| Co      | K series  | 1.26119  | 1.00                  | 54.08  | 0.53      |
| Mo      | L series  | 1.73629  | 1.00                  | 21.86  | 0.59      |
| Total:  |           |          |                       | 100.00 |           |

Figure S4. EDX spectra of CoMo-LDH.

| Sample   | Element | Concentration | Concentration |
|----------|---------|---------------|---------------|
|          |         | Wt.%          | At.%          |
| CoMo-LDH | Co      | 22.6          | 38.4          |
|          | Mo      | 7.1           | 7.4           |

Table S1. ICP results of the CoMo-LDH

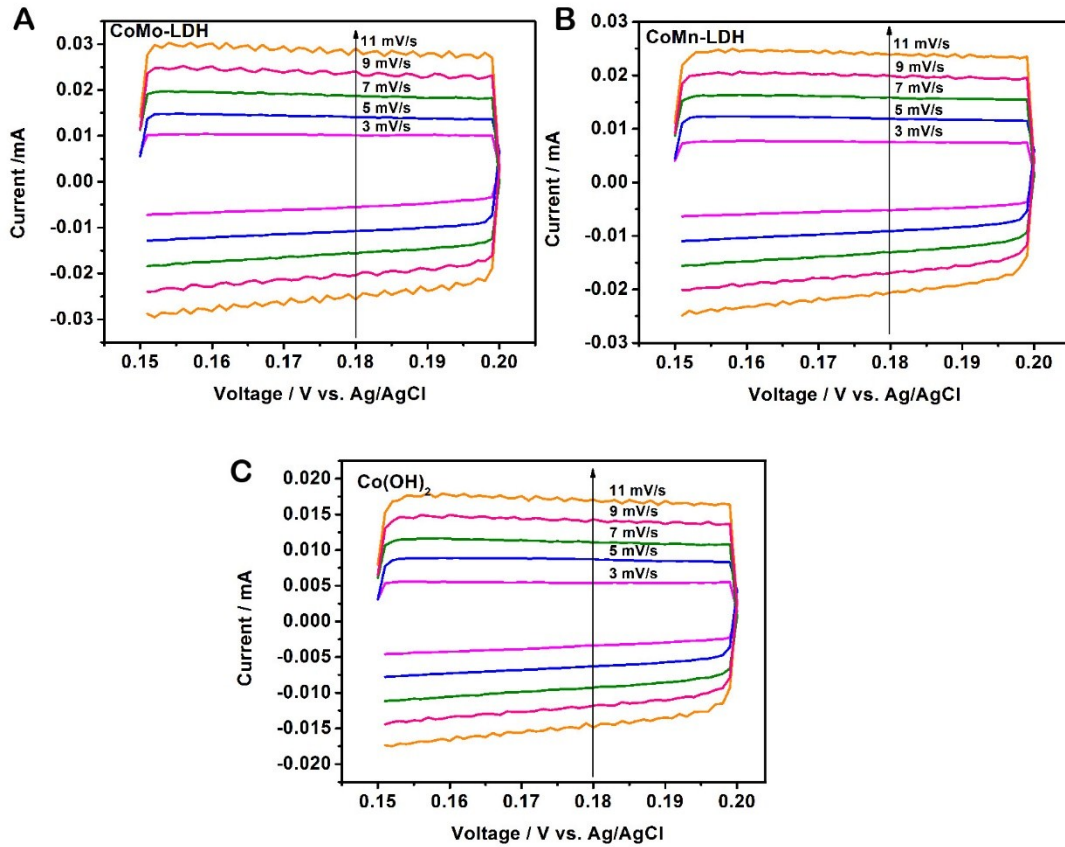

Figure S5. The CDL plots of the CoMo-LDH, CoMn-LDH and  $\text{Co(OH)}_2$  samples.

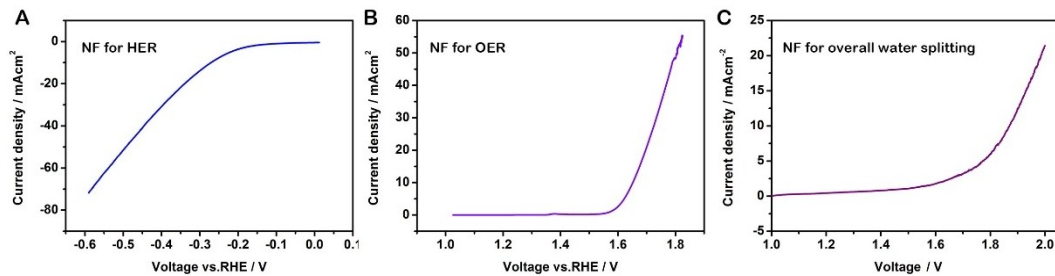

Figure S6. The LSV curves of nickel foam (NF) for the (A) HER, (B) OER and (C) overall water splitting.

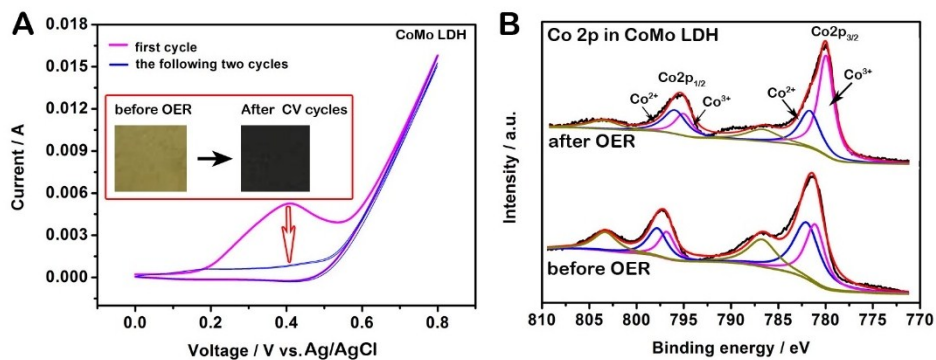

Figure S7. (A) Cyclic voltammetry (CV) curves for the CoMo-LDH deposited on ITO substrate in the OER process. Inset: Optical images of the CoMo-LDH prior to and after CV cycles. (B) The Co 2p XPS spectra for the CoMo LDH before and after the OER test.

In order to further investigate the role of the Mo<sup>6+</sup>, the first three CV curves were tested and shown in Figure S7A. After the 1st cycle, the peak assigned to the oxidation of Co<sup>2+</sup> to Co<sup>3+</sup> reduced indicating that the catalyst becomes irreversibly oxidized to a higher oxidation state of Co<sup>3+</sup>. Furthermore, XPS data for CoMo-LDH before and after electrocatalysis were collected. As illustrated in Figure S7B, the XPS spectrum shows an obvious increase in intensity for the Co<sup>3+</sup> and the decrease for the Co<sup>2+</sup> after OER, thus confirming the oxidation of Co<sup>2+</sup> to Co<sup>3+</sup>. Benefiting from the prominent ability to draw electrons of high-valence Mo<sup>6+</sup>, the Co would easily stay as their high-valence state, which is widely regarded as active sites for OER.

Table S2. Comparison of the OER performance with various reported materials loaded on the glassy carbon.

| Material                         | Overpotential (mV) /10 mA cm <sup>-2</sup> | Tafel slope mV / decade | Ref.      |
|----------------------------------|--------------------------------------------|-------------------------|-----------|
| CoMo LDH                         | 300                                        | 56                      | This work |
| NiCo LDH                         | 330                                        | 42                      | 1         |
| NiFe LDH                         | 300                                        | 40                      | 1         |
| NiCoP                            | 300                                        | 80                      | 2         |
| CoVOx                            | 347                                        | 49                      | 3         |
| CoFe LDH                         | 340                                        | 85                      | 5         |
| NiV LDH                          | 310                                        | 50                      | 4         |
| NiCo <sub>2</sub> O <sub>4</sub> | 320                                        | 32                      | 5         |
| CoMoO <sub>4</sub>               | 312                                        | 56                      | 6         |
| NiFe LDH/CR                      | 256                                        | 50                      | 7         |
| NiFe LDH/ CF                     | 260                                        | 55                      | 8         |

Table S3. Comparison of the overall water splitting performance with various reported materials loaded on the nickel foam.

| Material                                  | Voltage / V @ 10 mA cm <sup>-2</sup> | Electrolyte | Ref.      |
|-------------------------------------------|--------------------------------------|-------------|-----------|
| CoMo LDH                                  | 1.63                                 | 1 M KOH     | This work |
| VOOH                                      | 1.62                                 | 1 M KOH     | 9         |
| NiSe                                      | 1.63                                 | 1 M KOH     | 10        |
| NiCo <sub>2</sub> O <sub>4</sub>          | 1.65                                 | 1 M KOH     | 11        |
| NiFe/NiCo <sub>2</sub> O <sub>4</sub> /NF | 1.67                                 | 1 M KOH     | 12        |
| NiFe LDH                                  | 1.7                                  | 1M NaOH     | 1         |

## References

1. F. Song and X. Hu, *Nat. Commun.*, 2014, 5, 4477.
2. B. Qiu, L. Cai, Y. Wang, Z. Lin, Y. Zuo, M. Wang and Y. Chai, *Adv. Funct. Mater.*, 2018, 28, 1706008.
3. L. Liardet and X. Hu, *ACS Catal.* 2018, 8, 644–650.
4. K. Fan, H. Chen, Y. Ji, H. Huang, P. Claesson, Q. Daniel, B. Philippe, H. Rensmo, F. Li, Y. Luo and L. Sun, *Nat. Commun.*, 2016, 7, 11981.
5. J. Bao, X. Zhang, B. Fan, J. Zhang, M. Zhou, W. Yang, X. Hu, H. Wang, B. Pan and Y. Xie, *Angew. Chem. Int. Ed.*, 2015, 127, 7507-7512.
6. M. Yu, L. Jiang and H. Yang, *Chem. Commun.*, 2015, 51, 14361-14364.
7. X. Li, X.G. Hao, Z. D. Wang, A. Abudula and G. Q. Guan, *J. Power Sources*, 2017, 347, 193-200.
8. H. D. Yang, S. Luo, Y. Bao, Y. T. Luo, J. Jin and J.T. Ma, *Inorg. Chem. Front.*, 2017, 4, 1173-1181.
9. H. Shi, H. Liang, F. Ming and Z. Wang, *Angew. Chem. Int. Ed.*, 2017, 129, 588-592.
10. C. Tang, N. Cheng, Z. Pu, W. Xing and X. Sun, *Angew. Chem. Int. Ed.*, 2017, 127, 9483-9487.
11. X. Gao, H. Zhang, Q. Li, X. Yu, Z. Hong, X. Zhang, C. Liang and Z. Lin, *Angew. Chem. Int. Ed.*, 2017, 128, 6398-6402.
12. C. Xiao, Y. Li, X. Lu and C. Zhao, *Adv. Funct. Mater.* 2016, 26, 3515–3523.
